# Supplementary material
Source: PubMed Central journal article supplement (PMC122230)
Supplement: pnas_99_3_1562__2.pdf [file pnas_99_3_1562__2.pdf]

Supporting information for Revel *et al.* (2002) *Proc. Natl. Acad. Sci. USA* **99** (3), 1562–1567. (10.1073/pnas.032667699)

**Table 1. Genome-directed primers specific for *Borrelia burgdorferi* B31 (5' → 3')**

|          |          |          |          |
|----------|----------|----------|----------|
| TTTTTAAA | TTAAAAAA | AAATCCAA | TTTAGCAA |
| TTTTTATT | TATTTTAT | TTTTTCAA | TTTCTCAA |
| TCTTTTAA | TTCTTTTG | ATTTTIGT | TTTACCAA |
| AAATATTT | TAAAATTT | CTGTGCAG | ATATCCAC |
| TTTTTATA | AAATAATA | AATAAAAT | TTAACATT |
| AATTCCTT | TTATCAAA | ATTCTCAT | TTTTTTGG |
| AAAAATAA | AATCCCAT | ATTGCCAA | TAACACAA |
| TAAATAAA | CTTTTCAT | TTAATAAT | TGTAAAAA |
| ATTTAAAA | TTTAATAT | AAAAACAA | TAGAAAAA |
| TAAATTTA | ATAAAAAT | AATTCAT  | TATAATTC |
