# Supplementary material
Source: PubMed Central journal article supplement (PMC122230)
Supplement: pnas_99_3_1562__3.pdf [file pnas_99_3_1562__3.pdf]

Supporting information for Revel *et al.* (2002) *Proc. Natl. Acad. Sci. USA* **99** (3), 1562–1567. (10.1073/pnas.032667699)

**Table 2. Real-time reverse transcription-PCR primers for B31 gene detection and comparison between data generated by the two different methods**

| TIGR no.      | Gene name                                                    | Forward primer (5' → 3')           | Reverse primer (5' → 3')          | Microarray* |            |            | Reverse Transcription-PCR* |            |            |
|---------------|--------------------------------------------------------------|------------------------------------|-----------------------------------|-------------|------------|------------|----------------------------|------------|------------|
|               |                                                              |                                    |                                   | UT vs. FT   | FT vs. DMC | UT vs. DMC | UT vs. FT                  | FT vs. DMC | UT vs. DMC |
| 16S ribosomal | 16S ribosomal                                                | CACGCAGTGTCTCGTCCG                 | TACGGGAGGCAGCAGCTAAG              | NA          | NA         | NA         | NA                         | NA         | NA         |
| BB0061        | Thioredoxin (trxA)                                           | CAAAGTAGATACAGATAAGGAACAAGATATTTTC | GCTTGCCATCAACAGGAATAAAA           | 1.94        | 1.59       | -3.08      | 1.06                       | -9.51      | -8.94      |
| BB0070        | Conserved hypothetical protein                               | ATCAACGGTCAACCGCTCTTT              | AAGGGCAAATGCAAGAGCTATT            | -5.23       | 1.46       | -1.13      | -2.85                      | 2.65       | -1.08      |
| BB0096        | V-type ATPase, subunit E, putative                           | AGCTGCTAGAGTATTAAGGCAAATC          | TCAACGCCAATAATTAATCTCTTATTG       | 3.66        | -1.21      | 3.03       | 2.6                        | -1.73      | 1.51       |
| BB0147        | Flagellar filament core protein (flaB)                       | AATCTTTTCTCTGGTGAGGGAGC            | GCTCCTTCCTGTTGAACACCC             | 2.26        | -2.58      | -1.14      | 1.85                       | -1.99      | -1.07      |
| BB0296        | Heat shock protein (hslV)                                    | AAAGGGCGGCTGTTGACC                 | CAACAAGCATCATAGCCTCAAGC           | 3.2         | 1.82       | -1.76      | 2.16                       | 1.1        | -1.05      |
| BB0323        | Hypothetical protein                                         | TCGCATACGAAGAAAAAGTGGGA            | TTTCCCACAATGTTCTAGATCTTTCA        | 6.8         | -5.4       | 1.26       | 2.47                       | -3.49      | -1.42      |
| BB0466        | ABC transporter, ATP-binding protein                         | GCGTATACTCTTCTGGTGGAGAGAG          | AGCAAAAGGTTTCATCTAAGAGTAAAAAATAAG | -3.54       | 1.32       | -2.67      | -2.08                      | 2.33       | 1.12       |
| BB0545        | Xylulokinase (xylB)                                          | GCGTAATTAATGCGGGATCAG              | CATTCTATTTGACACAATTCCTTCTTG       | -3.89       | 1.34       | -2.9       | -3.62                      | 1.65       | -2.2       |
| BB0671        | Chemotaxis operon protein (cheX)                             | GAAGAAACAAAAGAGATGGTTGCTG          | CTTGGCATGCAAAGTGGAACA             | 6.46        | -2.69      | 2.41       | 3.25                       | -1.49      | 2.17       |
| BB0677        | Ribose/galactose ABC transporter, ATP-binding protein (mglA) | CAATATTCCTTCGGACAGGCA              | TCAGGATTATCAAAGCTCTTAAGTCCA       | 3.88        | -1.54      | 2.53       | 2.64                       | -2.64      | 1          |
| BB0789        | Cell division protein (ftsH)                                 | TGGAACGCATACCAATGTAATTG            | TCGTCCAGGCCTAAGCAAAG              | 1.47        | -2.43      | -3.57      | 2.36                       | -1.77      | -1.33      |
| BBA05         | Antigen, S1                                                  | TGCTCTTGGTGGGTGGCT                 | AATCTCCCCACCGCTTTTTT              | 9.22        | -7.04      | 1.31       | 83.29                      | -23.4      | 3.56       |
| BBA07         | chpAI protein, putative                                      | AAAGAAATGCTTGTTACTGTTGTTAAGTG      | GTTTTTCAACCTGTAGCAATTGC           | 11.11       | -9.05      | 1.22       | 306.55                     | -27.27     | 11.24      |
| BBA15         | Outer surface protein A (ospA)                               | GGCGTAAAAGCTGACAAAAGTAAAGTA        | TGTTTTGCCATCTTCTTGAAAAC           | 1.41        | -8.86      | -12.48     | -1.16                      | -3.53      | -4.09      |
| BBA24         | Decorin-binding protein A (dbpA)                             | GATTAGAACGAAGCGCTAAAGACA           | GGCATCAAAATTTACGCCCTT             | 46.68       | -14.77     | 3.16       | 108.38                     | -6.32      | 17.15      |
| BBA36         | Lipoprotein                                                  | CAATATTCTAGCATTGTTTCTAAAGCAGT      | AGCCTCCCCTTTGCTATTTTTAA           | 58.08       | -6.33      | 9.18       | 138.53                     | -2.99      | 46.34      |
| BBB19         | Outer surface protein C (ospC)                               | CGGATTCTAATGCGGTTTTACTTG           | CAATAGCTTTAGCAGCAATTTTCATCT       | 196.29      | 1.62       | 119.37     | 121.95                     | 1.2        | 146.03     |

\*UT, unfed tick; FT, fed tick; DMC, dialysis membrane chamber; NA, not applicable.
