# Supplementary material
Source: PubMed Central journal article supplement (PMC122230)
Supplement: pnas_99_3_1562__4.pdf [file pnas_99_3_1562__4.pdf]

Supporting information for Revel *et al.* (2002) *Proc. Natl. Acad. Sci. USA* **99** (3), 1562–1567.  
(10.1073/pnas.032667699)

**Table 3. Gene expression variations greater than 1.8-fold comparing *in vitro* 23°C, pH 7.5 (unfed tick) to *in vitro* 37°C, pH 6.8 (fed tick)**

| <b>TIGR gene no. and annotation</b>                                         | <b>Fold change</b> | <b>Uncertainty</b> | <b>Gene function</b>                                 | <b>Paralogous family</b> |
|-----------------------------------------------------------------------------|--------------------|--------------------|------------------------------------------------------|--------------------------|
| BBL29 conserved hypothetical protein                                        | -10.11             | 0.47               |                                                      | 161                      |
| BB0191 hypothetical protein                                                 | -7.63              | 0.36               |                                                      | ---                      |
| BB0385 basic membrane protein D (bmpD)                                      | -5.96              | 0.42               | Cell Envelope/Other                                  | 36                       |
| BB0684 carotenoid biosynthesis protein, putative                            | -5.42              | 0.36               | Unknown Function/General                             | ---                      |
| BB0070 conserved hypothetical protein                                       | -5.23              | 0.4                |                                                      | ---                      |
| BB0545 xylulokinase (xylB)                                                  | -3.89              | 0.36               | Energy Metabolism/Sugars                             | ---                      |
| BB0466 ABC transporter, ATP-binding protein                                 | -3.54              | 0.34               | Transport and binding proteins/Unknown substrate     | 4                        |
| BB0683 3-hydroxy-3-methylglutaryl-CoA synthase                              | -3.22              | 0.38               | Fatty Acid and Phospholipid Metabolism/Biosynthesis  | ---                      |
| BB0686 mevalonate pyrophosphate decarboxylase                               | -2.93              | 0.37               | Fatty Acid and Phospholipid Metabolism/Biosynthesis  | ---                      |
| BB0423 hypothetical protein                                                 | -2.84              | 0.4                |                                                      | ---                      |
| BBF07 hypothetical protein                                                  | -2.79              | 0.4                |                                                      | 100                      |
| BB0533 phnP protein (phnP)                                                  | -2.7               | 0.37               | Central Intermediary Metabolism/Phosphorus compounds | ---                      |
| BBB23 conserved hypothetical protein                                        | -2.64              | 0.39               |                                                      | 94                       |
| BB0269 minD-related ATP-binding protein (ylxH-1)                            | -2.59              | 0.36               | Cellular Processes/Cell division                     | 32                       |
| BB0384 basic membrane protein C (bmpC)                                      | -2.57              | 0.34               | Cell Envelope/Other                                  | 36                       |
|                                                                             |                    |                    |                                                      | ---                      |
| BBO28 lipoprotein (mlpG)                                                    | 2.21               | 0.39               | Cell Envelope/Other                                  | 113                      |
| BB0351 hypothetical protein                                                 | 2.47               | 0.43               |                                                      | ---                      |
| BB0135 histidyl-tRNA synthetase (hisS)                                      | 2.51               | 0.38               | Protein Synthesis/tRNA aminoacylation                | ---                      |
| BB0151 N-acetylglucosamine-6-phosphate deacetylase (nagA)                   | 2.51               | 0.39               | Energy Metabolism/Sugars                             | ---                      |
| BB0195 conserved hypothetical protein                                       | 2.55               | 0.36               |                                                      | 123                      |
| BBA61 conserved hypothetical protein                                        | 2.55               | 0.39               |                                                      | ---                      |
| BB0397 hypothetical protein                                                 | 2.66               | 0.42               |                                                      | ---                      |
| BB0216 phosphate ABC transporter, permease protein (pstC)                   | 2.66               | 0.42               | Transport and binding proteins/Anions                | 41                       |
| BB0561 phosphogluconate dehydrogenase, decarboxylating (gnd)                | 2.69               | 0.38               | Energy Metabolism/Pentose phosphate pathway          | ---                      |
| BB0689 hypothetical protein                                                 | 2.7                | 0.36               |                                                      | ---                      |
| BBA03 outer membrane protein                                                | 2.72               | 0.35               | Cell Envelope/Other                                  | ---                      |
| BB0365 lipoprotein LA7                                                      | 2.74               | 0.4                | Cell Envelope/Other                                  | ---                      |
| BBK13 conserved hypothetical protein                                        | 2.83               | 0.37               |                                                      | 40                       |
| BBM29 conserved hypothetical protein                                        | 2.91               | 0.36               |                                                      | 161                      |
| BBR36 conserved hypothetical protein                                        | 2.93               | 0.37               |                                                      | 165                      |
| BBN29 hypothetical protein, paralogous family 161, authentic point mutation | 3.03               | 0.35               |                                                      | 161                      |

| <b>TIGR gene no. and annotation</b>                                                    | <b>Fold change</b> | <b>Uncertainty</b> | <b>Gene function</b>                                                                      | <b>Paralogous family</b> |
|----------------------------------------------------------------------------------------|--------------------|--------------------|-------------------------------------------------------------------------------------------|--------------------------|
| BB0601 serine hydroxymethyltransferase (glyA)                                          | 3.03               | 0.39               | Amino Acid Biosynthesis/Serine family                                                     | ---                      |
| BB0037 1-acyl-sn-glycerol-3-phosphate acyltransferase (plsC)                           | 3.06               | 0.35               | Fatty Acid and Phospholipid Metabolism/Biosynthesis                                       | ---                      |
| BBP39 erpB2 protein (erpB2)                                                            | 3.08               | 0.38               | Cell Envelope/Other                                                                       | 163                      |
| BB0330 oligopeptide ABC transporter, periplasmic oligopeptide-binding protein (oppA-3) | 3.11               | 0.42               | Transport and binding proteins/Aminoacids, peptides and amines                            | 37                       |
| BBO40 erpM protein (erpM)                                                              | 3.16               | 0.35               | Cell Envelope/Other                                                                       | 163                      |
| BB0296 heat shock protein (hslV)                                                       | 3.2                | 0.37               | Protein Fate/Protein folding and stabilization                                            | ---                      |
| BB0741 chaperonin (groES)                                                              | 3.2                | 0.41               | Protein Fate/Protein folding and stabilization                                            | ---                      |
| BBA74 outer membrane porin (oms28)                                                     | 3.32               | 0.4                | Transport and binding proteins/Porins                                                     | 171                      |
| BB0036 DNA topoisomerase IV (parE)                                                     | 3.35               | 0.37               | DNA Metabolism/DNA replication, recombination, and repair                                 | 30                       |
| BB0588 5'-methylthioadenosine/S-adenosylhomocysteine nucleosidase, putative (pfs-2)    | 3.35               | 0.36               | Purines, Pyrimidines, Nucleosides, and Nucleotides/Salvage of nucleosides and nucleotides | 26                       |
| BBS30 lipoprotein (mlpC)                                                               | 3.38               | 0.36               | Cell Envelope/Other                                                                       | 113                      |
| BB0257 cell division protein, putative                                                 | 3.47               | 0.43               | Cellular Processes/Cell division                                                          | ---                      |
| BBA71 hypothetical protein                                                             | 3.48               | 0.39               |                                                                                           | 54                       |
| BB0646 hypothetical protein                                                            | 3.57               | 0.35               |                                                                                           | ---                      |
| BBI42 outer membrane protein, putative                                                 | 3.61               | 0.4                | Cell Envelope/Other                                                                       | 52                       |
| BBJ34 hypothetical protein                                                             | 3.62               | 0.37               |                                                                                           | 92                       |
| BB0096 V-type ATPase, subunit E, putative                                              | 3.66               | 0.38               | Energy Metabolism/ATP-proton motive force interconversion                                 | ---                      |
| BB0518 heat shock protein 70 (dnaK-2)                                                  | 3.83               | 0.39               | Protein Fate/Protein folding and stabilization                                            | 9                        |
| BB0677 ribose/galactose ABC transporter, ATP-binding protein (mgIA)                    | 3.88               | 0.41               | Transport and binding proteins/Carbohydrates, organic alcohols, and acids                 | 4                        |
| BBK53 outer membrane protein                                                           | 3.95               | 0.4                | Cell Envelope/Other                                                                       | 52                       |
| BBN35 conserved hypothetical protein                                                   | 4.09               | 0.4                |                                                                                           | 165                      |
| BBK07 hypothetical protein                                                             | 4.1                | 0.37               |                                                                                           | 59                       |
| BBP35 conserved hypothetical protein                                                   | 4.2                | 0.34               |                                                                                           | 165                      |
| BB0668 flagellar filament outer layer protein (flaA)                                   | 4.22               | 0.36               | Cellular Processes/Chemotaxis and motility                                                | ---                      |
| BBQ47 erpX protein (erpX)                                                              | 4.23               | 0.4                | Cell Envelope/Other                                                                       | 163                      |
| BBO36 conserved hypothetical protein                                                   | 4.29               | 0.37               |                                                                                           | 165                      |
| BB0669 chemotaxis histidine kinase (cheA-2)                                            | 4.58               | 0.39               | Cellular Processes/Chemotaxis and motility                                                | 134                      |
| BB0094 V-type ATPase, subunit A (atpA)                                                 | 4.58               | 0.46               | Energy Metabolism/ATP-proton motive force interconversion                                 | 39                       |
| BB0329 oligopeptide ABC transporter, periplasmic oligopeptide-binding protein (oppA-2) | 4.77               | 0.41               | Transport and binding proteins/Aminoacids, peptides and amines                            | 37                       |
| BBR29 conserved hypothetical protein                                                   | 4.99               | 0.37               |                                                                                           | 161                      |
| BBJ23 hypothetical protein                                                             | 5.12               | 0.37               |                                                                                           | 106                      |
| BB0563 hypothetical protein                                                            | 5.19               | 0.35               |                                                                                           | 35                       |

| <b>TIGR gene no. and annotation</b>                                                  | <b>Fold change</b> | <b>Uncertainty</b> | <b>Gene function</b>                                                                      | <b>Paralogous family</b> |
|--------------------------------------------------------------------------------------|--------------------|--------------------|-------------------------------------------------------------------------------------------|--------------------------|
| BBC12 conserved hypothetical protein                                                 | 5.22               | 0.39               |                                                                                           | 165                      |
| BBQ03 outer membrane protein, putative                                               | 5.29               | 0.42               | Cell Envelope/Other                                                                       | 52                       |
| BBM38 erpK protein (erpK)                                                            | 5.33               | 0.35               | Cell Envelope/Other                                                                       | 164                      |
| BBJ45 hypothetical protein                                                           | 5.33               | 0.39               |                                                                                           | 59                       |
| BBL40 erpB2 protein (erpB2)                                                          | 5.58               | 0.41               | Cell Envelope/Other                                                                       | 163                      |
| BBA04 antigen, S2                                                                    | 5.69               | 0.39               | Cell Envelope/Biosynthesis and degradation of surface polysaccharide                      | 44                       |
| BB0565 purine-binding chemotaxis protein (cheW-2)                                    | 5.72               | 0.45               | Cellular Processes/Chemotaxis and motility                                                | 33                       |
| BB0567 chemotaxis histidine kinase (cheA-1)                                          | 5.74               | 0.4                | Cellular Processes/Chemotaxis and motility                                                | 134                      |
| BB0671 chemotaxis operon protein (cheX)                                              | 6.46               | 0.41               | Unknown Function/General                                                                  | ---                      |
| BBA72 hypothetical protein                                                           | 6.56               | 0.39               |                                                                                           | ---                      |
| BB0323 hypothetical protein                                                          | 6.8                | 0.35               |                                                                                           | ---                      |
| BB0680 methyl-accepting chemotaxis protein (mcp-4)                                   | 7.14               | 0.39               | Cellular Processes/Chemotaxis and motility                                                | 13                       |
| BBC05 conserved hypothetical protein                                                 | 7.25               | 0.38               |                                                                                           | 161                      |
| BBA05 antigen, S1                                                                    | 9.22               | 0.4                | Cell Envelope/Biosynthesis and degradation of surface polysaccharide                      | ---                      |
| BBJ31 hypothetical protein                                                           | 9.26               | 0.39               |                                                                                           | 59                       |
| BBM28 lipoprotein (mlpF)                                                             | 10.61              | 0.43               | Cell Envelope/Other                                                                       | 113                      |
| BBA73 antigen, P35, putative                                                         | 11.05              | 0.39               | Cell Envelope/Biosynthesis and degradation of surface polysaccharide                      | 54                       |
| BBA07 chpAI protein, putative                                                        | 11.11              | 0.45               | Regulatory Functions/Other                                                                | ---                      |
| BBM27 rev protein (rev)                                                              | 12.25              | 0.48               | Unknown Function/General                                                                  | 63                       |
| BB0844 hypothetical protein                                                          | 15.1               | 0.39               |                                                                                           | 12                       |
| BB0681 methyl-accepting chemotaxis protein (mcp-5)                                   | 15.15              | 0.41               | Cellular Processes/Chemotaxis and motility                                                | 13                       |
| BBA64 antigen, P35                                                                   | 15.35              | 0.4                | Cell Envelope/Biosynthesis and degradation of surface polysaccharide                      | 54                       |
| BBK17 adenine deaminase (adeC)                                                       | 16.02              | 0.37               | Purines, Pyrimidines, Nucleosides, and Nucleotides/Salvage of nucleosides and nucleotides | 61                       |
| BBA34 oligopeptide ABC transporter, periplasmic oligopeptide-binding protein (oppAV) | 16.1               | 0.44               | Transport and binding proteins/Aminoacids, peptides and amines                            | 37                       |
| BBA65 hypothetical protein                                                           | 19.52              | 0.42               |                                                                                           | 54                       |
| BBK32 immunogenic protein P35                                                        | 28                 | 0.41               | Cell Envelope/Biosynthesis and degradation of surface polysaccharide                      |                          |
| BBA24 decorin binding protein A (dbpA)                                               | 46.68              | 0.38               | Cell Envelope/Other                                                                       | 74                       |
| BBA36 lipoprotein                                                                    | 58.08              | 0.37               | Cell Envelope/Other                                                                       | ---                      |
| BBA66 antigen, P35, putative                                                         | 75.22              | 0.41               | Cell Envelope/Biosynthesis and degradation of surface polysaccharide                      | 54                       |
| BBA25 decorin binding protein B (dbpB)                                               | 85.69              | 0.41               | Cell Envelope/Other                                                                       | 74                       |
| BBB19 outer surface protein C (ospC)                                                 | 196.29             | 0.43               | Cell Envelope/Other                                                                       | ---                      |
