# Supplementary material
Source: PubMed Central journal article supplement (PMC122230)
Supplement: pnas_99_3_1562__5.pdf [file pnas_99_3_1562__5.pdf]

**Table 4. Gene expression variations greater than 1.8-fold comparing *in vitro* 37°C, pH 6.8 (fed tick) to dialysis membrane chambers**

| <b>TIGR gene no. and annotation</b>                                                  | <b>Fold change</b> | <b>Uncertainty</b> | <b>Gene function</b>                                                                      | <b>Paralogous family</b> |
|--------------------------------------------------------------------------------------|--------------------|--------------------|-------------------------------------------------------------------------------------------|--------------------------|
| BBA66 antigen, P35, putative                                                         | -31.02             | 0.43               | Cell Envelope/Biosynthesis and degradation of surface polysaccharide                      | 54                       |
| BBK32 immunogenic protein P35                                                        | -19.31             | 0.42               | Cell Envelope/Biosynthesis and degradation of surface polysaccharide                      | ---                      |
| BBA65 hypothetical protein                                                           | -18.22             | 0.43               |                                                                                           | 54                       |
| BBA25 decorin binding protein B (dbpB)                                               | -18.11             | 0.47               | Cell Envelope/Other                                                                       | 74                       |
| BBA16 outer surface protein B (ospB)                                                 | -16.01             | 0.43               | Cell Envelope/Other                                                                       | 53                       |
| BBA24 decorin binding protein A (dbpA)                                               | -14.77             | 0.42               | Cell Envelope/Other                                                                       | 74                       |
| BBA34 oligopeptide ABC transporter, periplasmic oligopeptide-binding protein (oppAV) | -10.57             | 0.44               | Transport and binding proteins/Aminoacids, peptides and amines                            | 37                       |
| BBA07 chpAI protein, putative                                                        | -9.05              | 0.44               | Regulatory Functions/Other                                                                | ---                      |
| BBA15 outer surface protein A (ospA)                                                 | -8.86              | 0.42               | Cell Envelope/Other                                                                       | 53                       |
| BBK17 adenine deaminase (adeC)                                                       | -7.58              | 0.39               | Purines, Pyrimidines, Nucleosides, and Nucleotides/Salvage of nucleosides and nucleotides | 61                       |
| BBA05 antigen, S1                                                                    | -7.04              | 0.39               | Cell Envelope/Biosynthesis and degradation of surface polysaccharide                      | ---                      |
| BBA36 lipoprotein                                                                    | -6.33              | 0.41               | Cell Envelope/Other                                                                       | ---                      |
| BBA74 outer membrane porin (oms28)                                                   | -6.07              | 0.4                | Transport and binding proteins/Porins                                                     | 171                      |
| BBA64 antigen, P35                                                                   | -6.04              | 0.41               | Cell Envelope/Biosynthesis and degradation of surface polysaccharide                      | 54                       |
| BBC05 conserved hypothetical protein                                                 | -5.87              | 0.4                |                                                                                           | 161                      |
| BBM28 lipoprotein (mlpF)                                                             | -5.77              | 0.43               | Cell Envelope/Other                                                                       | 113                      |
| BBK07 hypothetical protein                                                           | -5.67              | 0.43               |                                                                                           | 59                       |
| BBJ08 hypothetical protein                                                           | -5.48              | 0.4                |                                                                                           | 12                       |
| BBQ03 outer membrane protein, putative                                               | -5.41              | 0.41               | Cell Envelope/Other                                                                       | 52                       |
| BB0323 hypothetical protein                                                          | -5.4               | 0.39               |                                                                                           | ---                      |
| BBB29 PTS system, maltose and glucose-specific IIBC component (malX)                 | -5.01              | 0.44               | Transport and binding proteins/Carbohydrates, organic alcohols, and acids                 | 16                       |
| BBI42 outer membrane protein, putative                                               | -4.81              | 0.45               | Cell Envelope/Other                                                                       | 52                       |
| BB0563 hypothetical protein                                                          | -4.81              | 0.4                |                                                                                           | 35                       |
| BB0631 hypothetical protein                                                          | -4.31              | 0.42               |                                                                                           | ---                      |
| BB0681 methyl-accepting chemotaxis protein                                           | -4.14              | 0.4                | Cellular Processes/Chemotaxis and motility                                                | 13                       |

| <b>TIGR gene no. and annotation</b>                                                                 | <b>Fold change</b> | <b>Uncertainty</b> | <b>Gene function</b>                                                      | <b>Paralogous family</b> |
|-----------------------------------------------------------------------------------------------------|--------------------|--------------------|---------------------------------------------------------------------------|--------------------------|
| (mcp-5)                                                                                             |                    |                    |                                                                           |                          |
| BBA04 antigen, S2                                                                                   | -4.08              | 0.4                | Cell Envelope/Biosynthesis and degradation of surface polysaccharide      | 44                       |
| BBK12 hypothetical protein                                                                          | -4.07              | 0.39               |                                                                           | 59                       |
| BB0629 PTS system, fructose-specific IIABC component (fruA-2)                                       | -4.07              | 0.36               | Transport and binding proteins/Carbohydrates, organic alcohols, and acids | 19                       |
| BBK47 hypothetical protein                                                                          | -4.05              | 0.4                |                                                                           | 69                       |
| BB0680 methyl-accepting chemotaxis protein (mcp-4)                                                  | -3.83              | 0.39               | Cellular Processes/Chemotaxis and motility                                | 13                       |
| BB0678 ribose/galactose ABC transporter, permease protein (rbsC-1)                                  | -3.78              | 0.43               | Transport and binding proteins/Carbohydrates, organic alcohols, and acids | 130                      |
| BB0238 hypothetical protein                                                                         | -3.76              | 0.39               |                                                                           | ---                      |
| BB0729 glutamate transporter (gltP)                                                                 | -3.71              | 0.46               | Transport and binding proteins/Amino acids, peptides and amines           | ---                      |
| BB0329 oligopeptide ABC transporter, periplasmic oligopeptide-binding protein (oppA-2)              | -3.63              | 0.42               | Transport and binding proteins/Amino acids, peptides and amines           | 37                       |
| BBA67 hypothetical protein                                                                          | -3.62              | 0.36               |                                                                           | ---                      |
| BBC12 conserved hypothetical protein                                                                | -3.56              | 0.4                |                                                                           | 165                      |
| BB0558 phosphoenolpyruvate-protein phosphatase (ptsI)                                               | -3.49              | 0.41               | Transport and binding proteins/Carbohydrates, organic alcohols, and acids | ---                      |
| BBA62 lipoprotein                                                                                   | -3.49              | 0.37               | Cell Envelope/Other                                                       | ---                      |
| BB0603 membrane-associated protein p66                                                              | -3.48              | 0.42               | Cell Envelope/Other                                                       | ---                      |
| BB0366 aminopeptidase I (yscI)                                                                      | -3.37              | 0.38               | Protein Fate/Degradation of proteins, peptides, and glycopeptides         | 131                      |
| BB0144 glycine betaine, L-proline ABC transporter, glycine/betaine/L-proline-binding protein (proX) | -3.1               | 0.37               | Transport and binding proteins/Amino acids, peptides and amines           | ---                      |
| BB0299 cell division protein (ftsZ)                                                                 | -3.09              | 0.41               | Cellular Processes/Cell division                                          | ---                      |
| BB0418 hypothetical protein                                                                         | -3.04              | 0.36               |                                                                           | ---                      |
| BBA73 antigen, P35, putative                                                                        | -3                 | 0.43               | Cell Envelope/Biosynthesis and degradation of surface polysaccharide      | 54                       |
| BB0694 signal recognition particle protein (ffh)                                                    | -2.99              | 0.4                | Protein Fate/Protein and peptide secretion and trafficking                | 10                       |
| BB0056 phosphoglycerate kinase (pgk)                                                                | -2.93              | 0.36               | Energy Metabolism/Glycolysis & gluconeogenesis                            | ---                      |
| BBJ09 outer surface protein D (ospD)                                                                | -2.88              | 0.38               | Cell Envelope/Other                                                       | ---                      |
| BB0057 glyceraldehyde 3-phosphate dehydrogenase (gap)                                               | -2.87              | 0.4                | Energy Metabolism/Glycolysis & gluconeogenesis                            | ---                      |
| BBR29 conserved hypothetical protein                                                                | -2.85              | 0.38               |                                                                           | 161                      |

| <b>TIGR gene no. and annotation</b>                                                 | <b>Fold change</b> | <b>Uncertainty</b> | <b>Gene function</b>                                                                      | <b>Paralogous family</b> |
|-------------------------------------------------------------------------------------|--------------------|--------------------|-------------------------------------------------------------------------------------------|--------------------------|
| BB0786 general stress protein (ctc)                                                 | -2.85              | 0.38               | Cellular Processes/Cell division                                                          | ---                      |
| BBK45 immunogenic protein P37, putative                                             | -2.75              | 0.35               | Cell Envelope/Biosynthesis and degradation of surface polysaccharides                     | 75                       |
| BBK48 immunogenic protein P37, putative                                             | -2.68              | 0.38               | Cell Envelope/Biosynthesis and degradation of surface polysaccharides                     | 75                       |
| BBP28 lipoprotein                                                                   | -2.67              | 0.41               | Cell Envelope/Other                                                                       | 113                      |
| BB0668 flagellar filament outer layer protein (flaA)                                | -2.66              | 0.39               | Cellular Processes/Chemotaxis and motility                                                | ---                      |
| BBK13 conserved hypothetical protein                                                | -2.63              | 0.37               |                                                                                           | 40                       |
| BB0691 translation elongation factor G (fus-2)                                      | -2.58              | 0.39               | Protein Synthesis/Translation factors                                                     | 11                       |
| BB0588 5'-methylthioadenosine/S-adenosylhomocysteine nucleosidase, putative (pfs-2) | -2.47              | 0.39               | Purines, Pyrimidines, Nucleosides, and Nucleotides/Salvage of nucleosides and nucleotides | 26                       |
| BB0789 cell division protein (ftsH)                                                 | -2.43              | 0.38               | Cellular Processes/Cell division                                                          | ---                      |
| BB0241 glycerol kinase (glpK)                                                       | -2.43              | 0.38               | Energy Metabolism/Other                                                                   | ---                      |
| BBJ34 hypothetical protein                                                          | -2.3               | 0.38               |                                                                                           | 92                       |
|                                                                                     |                    |                    |                                                                                           | ---                      |
| BBS25 conserved hypothetical protein                                                | 2.82               | 0.41               |                                                                                           | 112                      |
| BBH13 conserved hypothetical protein                                                | 2.83               | 0.39               |                                                                                           | 80                       |
| BBE16 hypothetical protein                                                          | 2.9                | 0.51               |                                                                                           | 99                       |
| BBF33 surface antigen lipoprotein at right end of lp28-1 (vlsE)"                    | 2.99               | 0.41               |                                                                                           | ---                      |
| BBF03 conserved hypothetical protein                                                | 3.34               | 0.39               |                                                                                           | 170                      |
| BBJ51 vlsE1 protein, authentic frameshift (vlsE1)                                   | 4.3                | 0.44               | Cell Envelope/Other                                                                       | 80                       |
|                                                                                     |                    |                    |                                                                                           | 170                      |
