# Supplementary material
Source: PubMed Central journal article supplement (PMC122230)
Supplement: pnas_99_3_1562__6.pdf [file pnas_99_3_1562__6.pdf]

Supporting information for Revel *et al.* (2002) *Proc. Natl. Acad. Sci. USA* **99** (3), 1562–1567. (10.1073/pnas.032667699)

**Table 5. Gene expression variations greater than 1.8-fold comparing *in vitro* 23°C, pH 7.5 (unfed tick) to dialysis membrane chambers**

| <b>TIGR gene no. and annotation</b>                                                                 | <b>Fold change</b> | <b>Uncertainty</b> | <b>Gene function</b>                                                      | <b>Paralogous family</b> |
|-----------------------------------------------------------------------------------------------------|--------------------|--------------------|---------------------------------------------------------------------------|--------------------------|
| BB0191 hypothetical protein                                                                         | -21.57             | 0.37               |                                                                           |                          |
| BBA16 outer surface protein B (ospB)                                                                | -15.31             | 0.4                | Cell Envelope/Other                                                       | 53                       |
| BBA15 outer surface protein A (ospA)                                                                | -12.48             | 0.38               | Cell Envelope/Other                                                       | 53                       |
| BBB29 PTS system, maltose and glucose-specific IIABC component (malX)                               | -10.56             | 0.42               | Transport and binding proteins/Carbohydrates, organic alcohols, and acids | 16                       |
| BB0070 conserved hypothetical protein                                                               | -7.6               | 0.41               |                                                                           | ---                      |
| BB0684 carotenoid biosynthesis protein, putative                                                    | -5.68              | 0.38               | Unknown Function/General                                                  | ---                      |
| BB0690 neutrophil activating protein (napA)                                                         | -5.24              | 0.4                | Cellular Processes/Detoxification                                         | ---                      |
| BB0423 hypothetical protein                                                                         | -4.82              | 0.46               |                                                                           | ---                      |
| BB0424 hypothetical protein                                                                         | -4.78              | 0.46               |                                                                           | ---                      |
| BB0533 phnP protein (phnP)                                                                          | -4.62              | 0.36               | Central Intermediary Metabolism/Phosphorus compounds                      | ---                      |
| BB0137 long-chain-fatty-acid CoA ligase                                                             | -4.41              | 0.38               | Fatty Acid and Phospholipid Metabolism/Degradation                        | 25                       |
| BB0366 aminopeptidase I (yscI)                                                                      | -4.37              | 0.36               | Protein Fate/Degradation of proteins, peptides, and glycopeptides         | 131                      |
| BB0691 translation elongation factor G (fus-2)                                                      | -4.28              | 0.38               | Protein Synthesis/Translation factors                                     | 11                       |
| BBA62 lipoprotein                                                                                   | -4.26              | 0.36               | Cell Envelope/Other                                                       | ---                      |
| BB0144 glycine betaine, L-proline ABC transporter, glycine/betaine/L-proline-binding protein (proX) | -4.22              | 0.4                | Transport and binding proteins/Amino acids, peptides and amines           | ---                      |
| BBQ36 hypothetical protein                                                                          | -3.84              | 0.39               |                                                                           | ---                      |
| BB0789 cell division protein (ftsH)                                                                 | -3.57              | 0.38               | Cellular Processes/Cell division                                          | ---                      |
| BB0269 minD-related ATP-binding protein (ylxH-1)                                                    | -3.33              | 0.36               | Cellular Processes/Cell division                                          | 32                       |
| BB0683 3-hydroxy-3-methylglutaryl-CoA                                                               | -3.31              | 0.39               | Fatty Acid and Phospholipid Metabolism/Biosynthesis                       | ---                      |

|                                                         |       |      |                                                                       |     |
|---------------------------------------------------------|-------|------|-----------------------------------------------------------------------|-----|
| synthase                                                |       |      |                                                                       |     |
| BBK45 immunogenic protein P37, putative                 | -3.27 | 0.36 | Cell Envelope/Biosynthesis and degradation of surface polysaccharides | 75  |
| BBA38 hypothetical protein                              | -3.26 | 0.4  |                                                                       | 146 |
| BBQ42 conserved hypothetical protein                    | -3.26 | 0.4  |                                                                       | 80  |
| BB0149 flagellar hook-associated protein 2 (fliD)       | -3.26 | 0.38 | Cellular Processes/Chemotaxis and motility                            | --- |
| BB0271 flagellar biosynthesis protein (flhA)            | -3.25 | 0.38 | Cellular Processes/Chemotaxis and motility                            | --- |
| BB0592 hypothetical protein                             | -3.15 | 0.4  |                                                                       | --- |
| BB0061 thioredoxin (trxA)                               | -3.08 | 0.37 | Energy Metabolism/Electron transport                                  | --- |
| BB0662 hypothetical protein                             | -3.03 | 0.4  |                                                                       | --- |
| BB0156 hypothetical protein                             | -2.95 | 0.42 |                                                                       | --- |
| BB0724 K <sup>+</sup> transport protein (ntpJ)          | -2.93 | 0.4  | Transport and binding proteins/Cations                                | --- |
| BB0545 xylulokinase (xylB)                              | -2.91 | 0.4  | Energy Metabolism/Sugars                                              | --- |
| BB0067 peptidase, putative                              | -2.89 | 0.36 | Protein Fate/Degradation of proteins, peptides, and glycopeptides     | --- |
| BB0241 glycerol kinase (glpK)                           | -2.74 | 0.38 | Energy Metabolism/Other                                               | --- |
| BB0466 ABC transporter, ATP-binding protein             | -2.67 | 0.34 | Transport and binding proteins/Unknown substrate                      | 4   |
| BBB22 conserved hypothetical protein                    | -2.65 | 0.37 |                                                                       | 94  |
| BB0805 polyribonucleotide nucleotidyltransferase (pnpA) | -2.6  | 0.36 | Transcription/Degradation of RNA                                      | --- |
| BB0824 hypothetical protein                             | -2.48 | 0.4  |                                                                       | --- |
| BB0141 membrane fusion protein (mtrC)                   | -2.45 | 0.35 | Cellular Processes/Toxin production and resistance                    | --- |
| BB0236 hypothetical protein                             | -2.36 | 0.39 |                                                                       | --- |
|                                                         |       |      |                                                                       | --- |
| BBL15 hypothetical protein                              | 2.32  | 0.39 |                                                                       | 156 |
| BB0036 DNA topoisomerase IV (parE)                      | 2.41  | 0.35 | DNA Metabolism/DNA replication, recombination, and repair             | 30  |
| BB0134 hypothetical protein                             | 2.57  | 0.36 |                                                                       | --- |
| BBA72 hypothetical protein                              | 2.8   | 0.38 |                                                                       | --- |
| BBL40 erpB2 protein (erpB2)                             | 2.85  | 0.38 | Cell Envelope/Other                                                   | 163 |
| BB0741 chaperonin (groES)                               | 2.94  | 0.4  | Protein Fate/Protein folding and stabilization                        | --- |

|                                                    |        |      |                                                                      |     |
|----------------------------------------------------|--------|------|----------------------------------------------------------------------|-----|
| BB0096 V-type ATPase, subunit E, putative          | 3.03   | 0.35 | Energy Metabolism/ATP-proton motive force interconversion            | --- |
| BB0567 chemotaxis histidine kinase (cheA-1)        | 3.19   | 0.39 | Cellular Processes/Chemotaxis and motility                           | 134 |
| BB0681 methyl-accepting chemotaxis protein (mcp-5) | 3.66   | 0.36 | Cellular Processes/Chemotaxis and motility                           | 13  |
| BBA73 antigen, P35, putative                       | 3.68   | 0.41 | Cell Envelope/Biosynthesis and degradation of surface polysaccharide | 54  |
| BB0669 chemotaxis histidine kinase (cheA-2)        | 3.71   | 0.38 | Cellular Processes/Chemotaxis and motility                           | 134 |
| BBJ23 hypothetical protein                         | 4.09   | 0.41 |                                                                      | 106 |
| BBJ31 hypothetical protein                         | 4.42   | 0.42 |                                                                      | 59  |
| BBA25 decorin binding protein B (dbpB)             | 4.73   | 0.46 | Cell Envelope/Other                                                  | 74  |
| BB0565 purine-binding chemotaxis protein (cheW-2)  | 5.72   | 0.4  | Cellular Processes/Chemotaxis and motility                           | 33  |
| BBJ51 vlsE1 protein, authentic frameshift (vlsE1)  | 8.46   | 0.48 | Cell Envelope/Other                                                  | 170 |
| BBA36 lipoprotein                                  | 9.18   | 0.4  | Cell Envelope/Other                                                  | --- |
| BB0844 hypothetical protein                        | 14.42  | 0.39 |                                                                      | 12  |
| BBB19 outer surface protein C (ospC)               | 119.37 | 0.42 | Cell Envelope/Other                                                  | --- |
